1 A rhesus macaque model of Asian lineage Zika virus infection

2

3 Dawn M. Dudley<sup>1\*</sup>, Matthew T. Aliota<sup>2\*</sup>, Emma Mohr<sup>3\*</sup>, Andrea M. Weiler<sup>4</sup>, Gabrielle Lehrer-  
4 Brey<sup>4</sup>, Kim L. Weisgrau<sup>4</sup>, Mariel S. Mohns<sup>1</sup>, Meghan E. Breitbach<sup>1</sup>, Mustafa N. Rasheed<sup>1</sup>,  
5 Christina M. Newman<sup>1</sup>, Dane D. Gellerup<sup>4</sup>, Louise H. Moncla<sup>1,2</sup>, Jennifer Post<sup>4</sup>, Nancy Schultz-  
6 Darken<sup>4</sup>, Michele L. Schotkzo<sup>4</sup>, Jennifer M. Hayes<sup>4</sup>, Josh A. Eudailey<sup>5</sup>, M. Anthony Moody<sup>5</sup>,  
7 Sallie R. Permar<sup>5</sup>, Shelby L. O'Connor<sup>1</sup>, Eva G. Rakasz<sup>4</sup>, Heather A. Simmons<sup>4</sup>, Saverio  
8 Capuano III<sup>4</sup>, Thaddeus G. Golos<sup>4,6</sup>, Jorge E. Osorio<sup>2</sup>, Thomas C. Friedrich<sup>2,4</sup>, and David H.  
9 O'Connor<sup>1,4</sup>

10

11 <sup>1</sup>Department of Pathology and Laboratory Medicine, University of Wisconsin-Madison;

12 <sup>2</sup>Department of Pathobiological Sciences, University of Wisconsin-Madison;<sup>3</sup>Department of

13 Pediatrics, School of Medicine and Public Health, University of Wisconsin-Madison; <sup>4</sup>Wisconsin

14 National Primate Research Center, University of Wisconsin-Madison; <sup>5</sup>Department of Pediatrics

15 and Human Vaccine Institute, Duke University Medical Center; <sup>6</sup>Department of Comparative

16 Biosciences and Obstetrics and Gynecology, University of Wisconsin-Madison.

17 \*These authors contributed equally to this work.

18

19 **Infection with Asian lineage Zika virus has been associated with Guillain-Barré**

20 **syndrome and fetal abnormalities** <sup>1-4</sup>, **but the mechanisms and risk factors for these**

21 **outcomes remain unknown. Here we show that rhesus macaques are susceptible to**

22 **infection by an Asian-lineage virus closely related to strains currently circulating in the**

23 **Americas. Following subcutaneous inoculation, Zika virus RNA was detected in plasma**

24 **one day post-infection (dpi) in all animals (N = 8, including 2 animals infected during the**

25 **first trimester of pregnancy). Plasma viral loads peaked above 1 x 10<sup>5</sup> viral RNA**

26 **copies/mL in seven of eight animals. Viral RNA was also present in saliva, urine, and**  
27 **cerebrospinal fluid (CSF), consistent with case reports from infected humans. Viral RNA**  
28 **was cleared from plasma and urine by 21 dpi in non-pregnant animals. In contrast, both**  
29 **pregnant animals remained viremic longer, up to 57 days. In all animals, infection was**  
30 **associated with transient increases in proliferating natural killer cells, CD8+ T cells, CD4+**  
31 **T cells, and plasmablasts. Neutralizing antibodies were detected in all animals by 21 dpi.**  
32 **Rechallenge of three non-pregnant animals with the Asian-lineage Zika virus 10 weeks**  
33 **after the initial challenge resulted in no detectable virus replication, suggesting that**  
34 **primary Zika virus infection elicits protective immunity against homologous virus strains.**  
35 **These data establish that Asian-lineage Zika virus infection of rhesus macaques provides**  
36 **a relevant animal model for studying pathogenesis in pregnant and non-pregnant**  
37 **individuals and evaluating potential interventions against human infection, including**  
38 **during pregnancy.**

39         Zika virus (ZIKV) is a mosquito-borne flavivirus first identified in 1947<sup>5</sup>. Little was known  
40 about ZIKV when fetal abnormalities and Guillain-Barré syndrome were reported coincident with  
41 epidemic spread of Asian-lineage ZIKV in South America<sup>6,7,1</sup>. Animal models are essential for  
42 quickly understanding ZIKV transmission and pathogenesis, as well as for evaluating candidate  
43 vaccines and therapeutics. ZIKV infects immunocompromised mice<sup>8</sup> but such mice do not mimic  
44 key attributes of human infection and fetal development.

45         In contrast, immunocompetent macaque monkeys are widely used in both infectious  
46 disease and obstetric research. To determine whether a physiologically relevant dose and route  
47 of Asian lineage ZIKV infects immunocompetent pregnant and non-pregnant macaques, we  
48 inoculated eight Indian-origin rhesus macaques (*Macaca mulatta*) subcutaneously with ZIKV  
49 derived from a French Polynesian virus isolate (Zika virus/H.sapiens-  
50 tc/FRA/2013/FrenchPolynesia-01\_v1c1). The eight animals were divided into three cohorts as  
51 shown in Extended Data Fig. 1.

51 To define the minimal dosage necessary to establish infection, two macaques per group  
52 were infected with  $1 \times 10^6$ ,  $1 \times 10^5$ , or  $1 \times 10^4$  PFU ZIKV (cohorts 1 and 2) (Fig. 1a). This dose  
53 range of inocula is based on previous work in related flaviviruses such as West Nile virus (WNV)  
54 and DENV, where it was estimated that mosquitoes delivered  $1 \times 10^4$ -  $1 \times 10^6$  PFU of virus<sup>9,10</sup>.  
55 This is also the range found in mosquito saliva in a recent publication specifically for Brazilian  
56 Zika virus<sup>11</sup>. None of the animals developed significant clinical disease (see Extended Data Fig.  
57 2 and SI Data)

58 Blood was sampled daily for 10-11 days post-infection (dpi) and every 3-7 days  
59 thereafter. Viral RNA (vRNA) was quantified by qRT-PCR from plasma<sup>12</sup> and was detected in all  
60 six animals at 1 dpi (Fig. 1b). Peak plasma viremia occurred between 2 and 6 dpi, and ranged  
61 from  $8.2 \times 10^4$  to  $2.5 \times 10^6$  vRNA copies/mL. These results resemble findings in humans in  
62 Colombia where the mean serum viral load was  $2.6 \times 10^5$  copies/ml  $\pm$  10 copies/ml in acutely  
63 infected individuals (n=10, range=537 -  $6.9 \times 10^5$  copies/ml) (manuscript submitted<sup>13</sup>). Infectious  
64 titers, measured from serum in cohort 2 animals, were 500-1000-fold less than copies of vRNA  
65 detected from plasma at the same time points (Fig. 1c). Copies of vRNA detected in the serum  
66 and plasma were very similar as shown in Extended Data Fig. 3. The estimated doubling time  
67 for plasma viremia averaged 7.7 hours (range = 4.8-10.2 hours) and was independent of the  
68 infecting dose and sex of the macaque. By 10 dpi, plasma viral loads were undetectable (<100  
69 vRNA copies/mL) in all six animals, although intermittent low-level detection (<550 vRNA  
70 copies/mL) continued sporadically through 17 dpi. Thereafter viral RNA remained undetectable  
71 in all fluids throughout follow-up (longest follow-up 70 dpi; Fig. 1b insets).

72 We also measured ZIKV vRNA by qRT-PCR in other body fluids including urine, saliva,  
73 CSF and vaginal fluid. Viruria was detected starting at 2-5 dpi and as late as 17 dpi, in urine  
74 passively collected from cage pans (Fig. 1b). Despite possible degradation of virus between the  
75 time of urination and sample collection and processing,  $1 \times 10^3$ - $1 \times 10^4$  vRNA copies/mL urine  
76 were detected at multiple timepoints. Virus was also detected in oral swabs collected from all six

77 animals, peaking at over  $1 \times 10^3$  vRNA copies per sample in 3 of 6 animals (Fig. 1b). Notably,  
78 as with urine, the kinetics of virus detection in saliva occurred after peak plasma viremia.  
79 Cisterna magna punctures were performed at 4 and 14 dpi to quantify viral RNA in CSF; vRNA  
80 was detectable at 4 dpi in 3 out of 5 animals from which CSF could be obtained (Fig. 1d).  
81 Vaginal swabs collected from the 3 female animals in cohort 2 had detectable vRNA starting at  
82 1 and/or 7 dpi, but were undetectable at 14, 21, and 28 dpi (Fig. 1e).

83 We next characterized the immune response to infection by staining peripheral blood  
84 mononuclear cells (PBMC) for multiple lineage and activation markers. Proliferating (Ki-67+) NK  
85 cells, CD8+ T cells, and CD4+ T cells expanded significantly above baseline levels by 6 dpi  
86 (Fig. 2a,b). NK and CD8+ T cell expansion increased as plasma vRNA loads decreased starting  
87 at 6 dpi. We also enumerated circulating plasmablasts, defined as CD3-/20-/14-/16-/11c-/123-  
88 and CD80+/HLA-DR+ cells, on 0, 3, 7, 11 and 14 dpi (Fig. 2c)<sup>14</sup>. The peak plasmablast  
89 expansion occurred between 7 and 10 dpi in 5/6 animals. Serum neutralizing antibody  
90 responses were also measured by plaque reduction neutralization tests (PRNT<sub>90</sub>). All animals  
91 exhibited high neutralizing antibody (nAb) titers as early as 14 dpi (Fig. 2d), the earliest time  
92 point tested. Cohort 1 animals were tested at 64 dpi and cohort 2 animals were tested at 14 and  
93 28 dpi. Together these data suggest that peak activation of the adaptive immune response and  
94 antibody production occurs 5-7 dpi and may both be important to control viral replication as  
95 evidenced by reducing vRNA loads in the plasma at these time points.

96 To determine whether activation of T cells correlated with the appearance of Zika virus-  
97 specific responses, we performed interferon-gamma ELISPOT on PBMCs collected at 4, 10 and  
98 14 dpi for cohort 2 animals. Cells were stimulated with pools of 15mer peptides collectively  
99 representing the amino acid sequence of the Asian-lineage NS5 protein (GenBank: KU321639).  
100 We detected specific IFN-gamma secretion in response to 12 of 16 peptide pools in at least one  
101 animal (Extended Data Fig. 4a). Overall, this data supports that there are ZIKV-specific T cell  
102 responses in all animals tested.

103 To determine whether the immune responses that we detected following primary  
104 challenge were protective against homotypic rechallenge, we rechallenged the three animals in  
105 cohort 1 ten weeks after primary infection with  $1 \times 10^4$  PFU of a homologous virus (Fig. 1b inset  
106 and Extended Data Fig. 1). Plasma, urine and saliva vRNA loads remain negative to at least 9  
107 dpi (as of 5/4/2016), indicating complete protection against ZIKV re-infection.

108 We also challenged two time-mated rhesus macaques at approximately gestation day 31  
109 and 38 (mid-first trimester) with  $1 \times 10^4$  PFU of ZIKV (cohort 3; see Extended Data Fig. 1 and  
110 Fig. 3a). Both animals were viremic by 1 dpi and exhibited peak plasma viral loads of  $> 4 \times 10^5$   
111 vRNA copies/ml by 3 or 6 dpi (Fig. 3b). Infectious virus was also quantitated by plaque assay  
112 from the serum of 660875 (Extended Data Fig. 5). In contrast to their non-pregnant  
113 counterparts, both animals maintained persistent plasma viremia (vRNA copies/ml) to 57+ and  
114 29 dpi (Fig. 3b). This is similar to a case described by Driggers et. al., where a pregnant mother  
115 had persistent ZIKV vRNA detected from 35 to 70 dpi that did not resolve until termination of  
116 pregnancy<sup>7</sup>. The fetus was found to have  $2 \times 10^8$  copies/ml of virus in brain tissue and it is  
117 speculated that the fetus may have been the source of the prolonged maternal plasma viremia.  
118 We will continue to monitor these pregnant animals for vRNA in the blood and amniotic fluid and  
119 will determine the infection status of the fetus upon termination of the pregnancy either at full  
120 term or earlier if necessary for the health and safety of the mother. Amniocentesis using  
121 ultrasound guidance was performed at 43 dpi for 827577 and 36 dpi for 660875 and both were  
122 negative for ZIKV RNA.

123 Both animals generated similar activation of NK, CD8+ T cell and CD4+ T cell responses  
124 above baseline as non-pregnant animals (Fig. 3c). Expansion of plasmablast cells was also  
125 observed by 10-21 dpi with one animal expanding more than, and one animal expanding less  
126 than, the average non-pregnant animal (Fig. 3d). Neutralizing antibodies were detected by 21  
127 dpi for 827577 and 10 dpi for 660875 and were similar to the cohort 2 non-pregnant animals at  
128 28 dpi (Fig. 3e). One pregnant animal exhibited an increase in CK above RI and above levels

129 expected with repeated ketamine sedation and blood collection. The same pregnant animal also  
130 developed persistent regenerative anemia characterized by circulating nucleated erythrocytes.  
131 Updates to the cohort 3 experiments are available in real-time at [goo.gl/rmNCqf](http://goo.gl/rmNCqf).

132         Altogether, our study shows the persistence of ZIKV RNA in the plasma of rhesus  
133 macaques for approximately 10 days, similar to other vector-borne flaviviruses that cause acute,  
134 typically self-limiting infections in humans. This work also shows that natural ZIKV infection  
135 elicits a robust immune response including ZIKV-specific T cell response and neutralizing  
136 antibody responses that confers protection against reinfection. However, the prolonged  
137 detection of vRNA in urine and saliva after apparent clearance from the blood, detection of virus  
138 in the CSF, and occasional plasma “blips” after initial clearance, suggest that ZIKV may persist  
139 longer, at low levels, in certain tissues. Future work in rhesus macaques will seek to determine if  
140 and where these reservoirs may exist and whether they seed virus into fluids that might allow for  
141 human-to-human transmission.

142         Our study establishes immunocompetent rhesus macaques infected with physiologically  
143 relevant ZIKV as a relevant translational model for infection and pathogenesis. The large  
144 immunological toolset available for rhesus macaques will enable investigations of immunity and  
145 potential vaccines. Pregnancy, the maternal-fetal interface, and fetal development have been  
146 described in detail in rhesus macaques, so this model will also enable assessments of the  
147 impact of maternal ZIKV infection on the developing fetus. We have established persistent  
148 viremia in pregnant macaques despite activation of NK cells and T cells as well as development  
149 of a neutralizing antibody response. We continue to follow these pregnant animals and will  
150 establish whether fetal infection and/or abnormalities have occurred through serial ultrasound  
151 assessments of the fetus and placenta as well as tissue analysis at pregnancy termination.

152

## 153 **Methods**

### 154 *Study design*

155 This was a proof-of-concept study designed to establish the infectivity and viral dynamics of  
156 Asian lineage ZIKV. Because nothing is known about ZIKV dosing in macaques, one male and  
157 one female rhesus macaque of Indian ancestry were each challenged with the following ZIKV  
158 doses:  $1 \times 10^6$ ,  $1 \times 10^5$ , and  $1 \times 10^4$  PFU ZIKV. Two pregnant macaques at 31 and 38 days of  
159 gestation were infected with  $1 \times 10^4$  PFU ZIKV. We selected 2 animals per inoculum dose and 2  
160 pregnant animals as a minimum number of animals for this pilot study to provide proof-of-  
161 concept and design larger studies necessary to place statistical significance on the findings. All  
162 macaques utilized in the study were free of Macacine herpesvirus 1, Simian Retrovirus Type D,  
163 Simian T-lymphotropic virus Type 1, and Simian Immunodeficiency Virus. Primary data from the  
164 study is available at [goo.gl/rmNCqf](http://goo.gl/rmNCqf).

165

#### 166 *Care and use of macaques at the Wisconsin National Primate Research Center*

167 All macaque monkeys used in this study were cared for by the staff at the Wisconsin National  
168 Primate Research Center (WNPRC) in accordance with the regulations and guidelines outlined  
169 in the Animal Welfare Act and the Guide for the Care and Use of Laboratory Animals and the  
170 recommendations of the Weatherall report. This study was approved by the University of  
171 Wisconsin-Madison Graduate School Institutional Animal Care and Use Committee (Animal  
172 Care and Use Protocol Number G005401). For all procedures (i.e., physical examinations, virus  
173 inoculations, ultrasound examinations, blood and swab collection), animals were anesthetized  
174 with an intramuscular dose of ketamine (10 mL/kg). Blood samples were obtained using a  
175 vacutainer system or needle and syringe from the femoral or saphenous vein.

176

#### 177 *Inoculations*

178 ZIKV strain H/PF/2013 (GenBank: KJ776791), originally isolated from a 51-year-old female in  
179 France returning from French Polynesia with a single round of amplification on Vero cells, was

180 obtained from Xavier de Lamballerie (European Virus Archive, Marseille France). We deep  
181 sequenced the challenge stock to verify the expected origin. The ZIKV challenge stock  
182 consensus sequence matched the Genbank sequence (KJ776791) of the parental virus, but  
183 there were 8 sites where between 5-40% of sequences contained variants that appear to be  
184 authentic (6/8 were non-synonymous changes) (Extended Data Fig. 6). Sequences have been  
185 deposited in the Sequence Read Archive (SRA) under accession number SRP072852 .

186  
187 Virus stocks were prepared by inoculation onto a confluent monolayer of C6/36 mosquito  
188 cells. These cell lines were obtained from ATCC, were not further authenticated and were not  
189 specifically tested for mycoplasma. A single harvest of virus with a titer of  $1.26 \times 10^6$  PFU/mL  
190 (equivalent to  $1.43 \times 10^9$  vRNA copies/mL) was used for all 8 challenges. The stock was  
191 thawed, diluted in PBS to the appropriate concentration for each challenge, and loaded into a 1  
192 mL syringe that was kept on ice until challenge. Animals were anesthetized as described above,  
193 and 1 mL of inocula was administered subcutaneously over the cranial dorsum. Post-  
194 inoculation, animals were closely monitored by veterinary and animal care staff for adverse  
195 reactions and signs of disease.

196

#### 197 *Viral RNA isolation from plasma*

198 Fresh plasma and PBMC were isolated from EDTA-treated whole blood by Ficoll density  
199 centrifugation at 1860 rcf for 30min. The plasma layer was collected and centrifuged for an  
200 additional 8 min at 670 rcf to remove residual cells. RNA was extracted from 300  $\mu$ l of plasma  
201 using the Viral Total Nucleic Acid Purification Kit (Promega, Madison, WI) on a Maxwell 16 MDx  
202 instrument. The RNA was then quantified by quantitative RT-PCR.

203

#### 204 *Viral RNA isolation from urine*



205 Urine was collected from a pan beneath the animal's cage. Urine was centrifuged for 5 min at  
206 500 rcf to remove cells and other debris. RNA was isolated from 300 µl urine using the Viral  
207 Total Nucleic Acid Purification Kit (Promega, Madison, WI) on a Maxwell 16 MDx instrument.

208

#### 209 *Viral RNA isolation from oral swabs*

210 Oral swab samples were collected from infected animals while anesthetized by gently running a  
211 sterile swab under the animal's tongue. Swabs were placed immediately into either RNAlater or  
212 viral transport medium (tissue culture medium 199 supplemented with 0.5% FBS and 1%  
213 antibiotic/antimycotic) for 60-90 minutes. Samples were vortexed vigorously, then centrifuged  
214 for 5 min at 500 rcf before removing the swabs. Samples were stored at either -20°C (RNAlater  
215 samples) or -80°C (viral transport medium) until processing. Prior to extraction, virus was  
216 pelleted by centrifugation for 1 hour at 4°C at 14000 rpm. Supernatant was removed, leaving the  
217 virus in 200 µl media. Viral RNA was extracted from these samples using the Qiaamp MinElute  
218 Virus Spin kit (Qiagen, Germantown, Maryland) with all optional washes. Viral load data from  
219 oral swabs are expressed as vRNA copies/mL eluate.

220

#### 221 *Quantitative reverse transcription PCR (qRT-PCR)*

222 Viral RNA isolated from plasma, urine, or oral swabs was quantified by qRT-PCR using the  
223 primers and probe designed by Lanciotti et al.<sup>12</sup>. The RT-PCR was performed using the  
224 SuperScript III Platinum one-step quantitative RT-PCR system (Invitrogen, Carlsbad, CA) on the  
225 LightCycler 480 instrument (Roche Diagnostics, Indianapolis, IN). Primers and probe were used  
226 at final concentrations of 600 nM and 100 nM respectively, along with 150 ng random primers  
227 (Promega, Madison, WI). Cycling conditions were as follows: 37°C for 15 min, 50°C for 30 min  
228 and 95°C for 2 min, followed by 50 cycles of 95°C for 15 sec and 60°C for 1 min. Virus  
229 concentration was determined by interpolation onto an internal standard curve composed of

230 seven 10-fold serial dilutions of a synthetic ZIKV RNA fragment based on the Asian-lineage  
231 (ZIKV strain H/PF/2013).

232

### 233 *Viral quantification by plaque assay*

234 Titrations for replication competent virus quantification of the challenge stock as well as from  
235 serum collected at multiple time points from cohort 2 animals were completed by plaque assay  
236 on Vero cell cultures. Vero cells were obtained from ATCC, were not further authenticated and  
237 were not specifically tested for mycoplasma. Duplicate wells were infected with 0.1 mL aliquots  
238 from serial 10-fold dilutions in growth media and virus was adsorbed for one hour. Following  
239 incubation, the inoculum was removed, and monolayers were overlaid with 3 ml containing a 1:1  
240 mixture of 1.2% oxoid agar and 2X DMEM (Gibco, Carlsbad, CA) with 10% (vol/vol) FBS and  
241 2% (vol/vol) penicillin/streptomycin. Cells were incubated at 37°C in 5% CO<sub>2</sub> for four days for  
242 plaque development. Cell monolayers then were stained with 3 mL of overlay containing a 1:1  
243 mixture of 1.2% oxoid agar and 2X DMEM with 2% (vol/vol) FBS, 2% (vol/vol)  
244 penicillin/streptomycin, and 0.33% neutral red (Gibco). Cells were incubated overnight at 37°C  
245 and plaques were counted. Titers of virus detected from the serum of cohort 2 animals were  
246 compared to plasma and serum viral load assays. For both the challenge stock and the virus  
247 isolated from macaque serum, the level of infectious virus detected by plaque assay was ~500-  
248 1000-fold less than the number of viral RNA particles detected by qRT-PCR in either the plasma  
249 or serum. This was true throughout the duration of viremia where plaque assay titers were  
250 detectable.

251

### 252 *Plaque reduction neutralization test (PRNT<sub>90</sub>)*

253 Macaque serum samples were screened for ZIKV neutralizing antibody utilizing a plaque  
254 reduction neutralization test (PRNT). Endpoint titrations of reactive sera, utilizing a 90% cutoff  
255 (PRNT<sub>90</sub>) were performed as described<sup>15</sup> against ZIKV strain H/PF/2013.

256

257 *Immunophenotyping*

258 The amount of activated/proliferating NK cells were quantified using a modified version of our  
259 protocol detailed step-by step in OMIP-28<sup>16</sup>. Briefly 0.1 mL of EDTA-anticoagulated whole blood  
260 samples were incubated for 15 min at room temperature in the presence of a mastermix of  
261 antibodies against CD45 (clone D058-1283, Brilliant Violet 786 conjugate), CD3 (clone SP34-2  
262 Alexa Fluor 700 conjugate), CD8 (clone SK2, Brilliant Violet 510), NKG2A/C (clone Z199, PE-  
263 Cy7 conjugate), CD16 (clone 3G8, Pacific Blue conjugate), CD69 (clone TP1.55.3, ECD  
264 conjugate), HLA-DR (clone 1D11, Brilliant Violet 650 conjugate), CD4 (clone SK3, Brilliant Violet  
265 711 conjugate), CCR7 (clone 150503, Fluorescein conjugate), CD28 (clone CD28.2, PE  
266 conjugate), and CD95 (clone DX2, PE-Cy5 conjugate) antigens. All antibodies were obtained  
267 from BD BioSciences, except the NKG2A/C-specific antibody, which was purchased from  
268 Beckman Coulter, and the CCR7 antibody that was purchased from R&D Systems. Red blood  
269 cells were lysed using BD Pharm Lyse, after which they were washed twice in media and fixed  
270 with 0.125 ml of 2% paraformaldehyde for 15 min. After an additional wash the cells were  
271 permeabilized using Life Technology's Bulk Permeabilization Reagent. The cells were stained  
272 for 15 min. with Ki-67 (clone B56, Alexa Fluor 647 conjugate) while the permeabilizer was  
273 present. The cells were then washed twice in media and resuspended in 0.125 ml of 2%  
274 paraformaldehyde until they were run on a BD LSRII Flow Cytometer. Flow data were analyzed  
275 using Flowjo version 9.8.2.

276

277 Interferon-gamma ELISPOT assay

278 Peripheral blood mononuclear cells (PBMCs) were isolated from EDTA-treated whole blood by  
279 using Ficoll-Paque Plus (GE Health Sciences) density centrifugation. Enzyme-linked  
280 immunosorbent spot (ELISPOT) assays were conducted according to the manufacturer's

281 protocol. Briefly,  $1 \times 10^5$  cells in 100ul of R10 medium were added to pre-coated monkey  
282 gamma interferon (IFN $\gamma$ ) ELISpot-PLUS plates (Mabtech Inc., Mariemont, OH) with peptide at a  
283 final concentration of 1uM. Full proteome peptides derived from the ZIKV NS5 sequence  
284 (GenBank: KU321639.1) used in this study were synthesized by GenScript (Piscataway, NJ).  
285 Pools were created using 10 overlapping 15mer peptides, each at a working concentration of  
286 1mM. Concanavalin A (10uM) was used as a positive control. Assays of all samples were  
287 repeated in duplicate or triplicate. Cells alone in the absence of stimulant were used as a  
288 negative control. Wells were imaged by using an AID ELISPOT reader, and spots were counted  
289 by using an automated program with parameters including size, intensity, and gradient. The limit  
290 of detection was set at 100 spot-forming cells per million PBMCs.

#### 291 *Plasmablast detection*

292 Peripheral blood mononuclear cells (PBMCs) isolated from three ZIKV-infected rhesus monkeys  
293 at 3, 7, 11, and 14 dpi were stained with the following panel of fluorescently labeled antibodies  
294 (Abs) specific for the following surface markers: CD20 FITC (L27), CD80 PE(L307.4), CD123  
295 PE-Cy7(7G3), CD3 APC-Cy7 (SP34-2), IgG BV605(G18-145) (all from BD Biosciences, San  
296 Jose, CA), CD14 AF700 (M5E2), CD11c BV421 (3.9), CD16 BV570 (3G8), CD27 BV650(O323)  
297 (all from BioLegend, San Diego, CA), IgD AF647 (polyclonal)(Southern Biotech, Birmingham,  
298 AL), and HLA-DR PE-TxRed (TÜ36) (Invitrogen, Carlsbad, CA). LIVE/DEAD Fixable Aqua Dead  
299 Cell Stain Kit (Invitrogen, Carlsbad, CA) was used to discriminate live cells. Briefly, cells were  
300 resuspended in 1X PBS/1%BSA and stained with the full panel of surface Abs for 30 min in the  
301 dark at 4°C, washed once with 1X PBS, stained for 30 min with LIVE/DEAD Fixable Aqua Dead  
302 Cell Stain Kit in the dark at 4°C, washed once with 1X PBS, washed again with 1X  
303 PBS/1%BSA, and resuspended in 2% PFA Solution. Stained PBMCs were acquired on a LSRII  
304 Flow Analyzer (BD Biosciences, San Jose, CA) and the data was analyzed using FlowJo  
305 software v9.7.6 (TreeStar, Ashland, OR). Plasmablasts were defined similarly to the method

306 previously described<sup>14</sup> excluding lineage cells (CD14+, CD16+, CD3+, CD20+, CD11c+,  
307 CD123+), and selecting CD80+ and HLA-DR+ cells (known to be expressed on rhesus  
308 plasmablasts and their human counterpart<sup>17</sup>).

309

### 310 *Estimation of plasma viremia doubling time*

311 The doubling time of plasma viremia was estimated in R version 3.2.3 (The R Foundation for  
312 Statistical Computing, <http://www.R-project.org>). For each animal, the slope of the linear portion  
313 of the line (between 1 and 2 dpi for the animals treated with  $1 \times 10^6$  and  $1 \times 10^5$  PFU and between  
314 1, 2, and 3 dpi for the animal treated with  $1 \times 10^4$  PFU) was generated by plotting the log of the  
315 plasma viral loads. The linear portion represents the exponential growth phase and has been  
316 used to estimate doubling time in other systems<sup>18</sup>. The slopes were then used in the equation:  
317  $\log(2)/\text{slope}$ . Each result was then multiplied by 24 hours to produce a simple estimate of  
318 doubling time in hours.

319

### 320 *CBC and blood chemistry panels*

321 CBCs were performed on EDTA-anticoagulated whole blood samples on a Sysmex XS-1000i  
322 automated hematology analyzer (Sysmex Corporation, Kobe, Japan). Blood smears were  
323 prepared and stained with Wright-Giemsa stain (Wescor Aerospray Hematology Slide Stainer;  
324 Wescor Inc, Logan, UT). Manual slide evaluations were performed on samples as appropriate  
325 when laboratory-defined criteria were met (including the presence of increased total white blood  
326 cell counts, increased monocyte, eosinophil, and basophil percentages, decreased hemoglobin,  
327 hematocrit, and platelet values, and unreported automated differential values). Individuals  
328 performing manual slide evaluations screened both white blood cells (WBC) and red blood cells  
329 (RBC) for cellular maturity, toxic change, and morphologic abnormalities.

330 Whole blood was collected into serum separator tubes (Becton, Dickinson and  
331 Company, Franklin Lakes, NJ) for blood chemistry analysis and processed per manufacturer's  
332 instructions. Blood chemistry panels were performed on the serum using a Cobas 6000  
333 analyzer (Roche Diagnostics, Risch-Rotkreuz, Switzerland). Results from CBC and blood  
334 chemistry panels were reported with species, age, and sex-specific reference ranges.

335

### 336 *Zika virus deep sequencing of the challenge stock*

337 A vial of the same ZIKV strain H/PF/2013 virus stock that infected macaques was deep  
338 sequenced by preparing libraries of fragmented double-stranded cDNA using methods similar to  
339 those previously described<sup>19</sup>. Briefly, the sample was centrifuged at 5000 rcf for 5 min. The  
340 supernatant was then filtered through a 0.45- $\mu$ m filter. The Qiagen QiAmp Minelute viral RNA  
341 isolation kit (omitting carrier RNA) was used to isolate vRNA. The eluted RNA was then treated  
342 with DNase I. Double stranded DNA was prepared with the Superscript double stranded cDNA  
343 synthesis kit (Invitrogen) and priming with random hexamers. Agencourt Ampure XP beads  
344 were used to purify double stranded DNA. The purified DNA was fragmented with the Nextera  
345 XT kit (Illumina), tagged with Illumina-compatible primers, and then purified with Agencourt  
346 Ampure XP beads. Purified libraries were then sequenced with 2 x 300 bp kits on an Illumina  
347 MiSeq. Of note, challenge stock viral loads were  $1.43 \times 10^9$  vRNA copies/ml. This results in an  
348 input of  $7.15 \times 10^8$  RNA copies into the sequencing reactions. This far exceeds the average  
349 depth of coverage of 11,877 (+/- 4658) sequences per nucleotide site indicating little resampling  
350 effects in our data analysis.

351

### 352 **References**

353 1. Brasil, P. et al. Zika Virus Infection in Pregnant Women in Rio de Janeiro - Preliminary  
354 Report. *N Engl J Med* (2016).

- 355 2. Cao-Lormeau, V. M. et al. Guillain-Barré Syndrome outbreak associated with Zika virus  
356 infection in French Polynesia: a case-control study. *Lancet* (2016).
- 357 3. Calvet, G. et al. Detection and sequencing of Zika virus from amniotic fluid of fetuses with  
358 microcephaly in Brazil: a case study. *Lancet Infect Dis* (2016).
- 359 4. Carteaux, G. et al. Zika Virus Associated with Meningoencephalitis. *N Engl J Med* (2016).
- 360 5. Musso, D. & Gubler, D. J. Zika Virus. *Clin Microbiol Rev* **29**, 487-524 (2016).
- 361 6. Sarno, M. et al. Zika Virus Infection and Stillbirths: A Case of Hydrops Fetalis,  
362 Hydranencephaly and Fetal Demise. *PLoS Negl Trop Dis* **10**, e0004517 (2016).
- 363 7. Driggers, R. W. et al. Zika Virus Infection with Prolonged Maternal Viremia and Fetal Brain  
364 Abnormalities. *N Engl J Med* (2016).
- 365 8. Rossi, S. L. et al. Characterization of a Novel Murine Model to Study Zika Virus. *Am J Trop*  
366 *Med Hyg* (2016).
- 367 9. Styer, L. M. et al. Mosquitoes inoculate high doses of West Nile virus as they probe and  
368 feed on live hosts. *PLoS Pathog* **3**, 1262-1270 (2007).
- 369 10. Cox, J., Mota, J., Sukupolvi-Petty, S., Diamond, M. S. & Rico-Hesse, R. Mosquito bite  
370 delivery of dengue virus enhances immunogenicity and pathogenesis in humanized mice.  
371 *J Virol* **86**, 7637-7649 (2012).
- 372 11. Dutra, H. L. et al. Wolbachia Blocks Currently Circulating Zika Virus Isolates in Brazilian  
373 *Aedes aegypti* Mosquitoes. *Cell Host Microbe* (2016).
- 374 12. Lanciotti, R. S. et al. Genetic and serologic properties of Zika virus associated with an  
375 epidemic, Yap State, Micronesia, 2007. *Emerg Infect Dis* **14**, 1232-1239 (2008).
- 376 13. Aliota MT, P. S. A., Dario Velez I, and Osorio JE. The wMel strain of Wolbachia reduces  
377 transmission of Zika virus by *Aedes aegypti*. *Scientific reports, in review* (2016).
- 378 14. Silveira, E. L. et al. Vaccine-induced plasmablast responses in rhesus macaques:  
379 phenotypic characterization and a source for generating antigen-specific monoclonal  
380 antibodies. *J Immunol Methods* **416**, 69-83 (2015).

- 381 15. Lindsey, H. S., Calisher, C. H. & Mathews, J. H. Serum dilution neutralization test for  
382 California group virus identification and serology. *J Clin Microbiol* **4**, 503-510 (1976).
- 383 16. Pomplun, N., Weisgrau, K. L., Evans, D. T. & Rakasz, E. G. OMIP-028: activation panel  
384 for Rhesus macaque NK cell subsets. *Cytometry A* **87**, 890-893 (2015).
- 385 17. Wrammert, J. et al. Rapid cloning of high-affinity human monoclonal antibodies against  
386 influenza virus. *Nature* **453**, 667-671 (2008).
- 387 18. Staprans, S. I. et al. Simian immunodeficiency virus disease course is predicted by the  
388 extent of virus replication during primary infection. *J Virol* **73**, 4829-4839 (1999).
- 389 19. Lauck, M. et al. Discovery and full genome characterization of two highly divergent simian  
390 immunodeficiency viruses infecting black-and-white colobus monkeys (*Colobus guereza*)  
391 in Kibale National Park, Uganda. *Retrovirology* **10**, 107 (2013).

392

393 **Supplementary Information** is linked to the online version of the paper at  
394 [www.nature.com/nature](http://www.nature.com/nature).

395

396 **Acknowledgements** We thank the Veterinary, Animal Care, Scientific Protocol Implementation,  
397 and the Pathology staff at the Wisconsin National Primate Research Center (WNPRC) for their  
398 contribution to this study. We thank the DHHS/PHS/NIH (R01AI116382-01A1 to D.H.O.),  
399 (R01AI107157-01A1 to T.G.G.) and (DP2HD075699 to S.R.P.) for funding. We also thank the  
400 P51OD011106 awarded to the WNPRC, Madison-Wisconsin. This research was conducted in  
401 part at a facility constructed with support from Research Facilities Improvement Program grants  
402 RR15459-01 and RR020141-01. The publication's contents are solely the responsibility of the  
403 authors and do not necessarily represent the official views of NCRR or NIH.

404

405 **Author contributions** D.H.O., T.C.F., J.E.O., M.T.A., E.M., T.G.G. and D.M.D. designed the  
406 experiments. D.H.O., D.M.D., M.T.A., E. M., T.C.F., and L.H.M. drafted the manuscript. M.T.A.,



407 and J.E.O. provided and prepared viral stocks and performed plaque assays. A.M.W., G.L-B.,  
408 and T.C.F. developed and performed viral load assays. K.L.W. and E.G.R. performed  
409 immunophenotyping assays. M.S.M., M.E.B., M.N.R., C.M.N., and D.M.D. coordinated and  
410 processed macaque samples for distribution. D.D.G., S.L.O., and D.M.D. designed and  
411 performed the sequencing experiments. L.H.M. and T.C.F. performed nucleotide diversity  
412 calculations. J.P., N.S-D., H.A.S., S.C., and J.M.H. coordinated the macaque infections,  
413 sampling, and performed blood chemistries and CBC analysis. M.L.S. coordinated experiments  
414 and helped perform ultrasounds on the pregnant macaques. J.A.E., M.A.M., and S.R.P.  
415 performed the plasmablast experiments.

416

417 **Author information:** Sequences have been deposited in the Sequence Read Archive (SRA)  
418 under accession number SRP072852. All data from these studies are available at  
419 [zika.labkey.com](http://zika.labkey.com). Reprints and permissions information is available at [www.nature.com/reprints](http://www.nature.com/reprints).  
420 The authors declare no competing interests. Correspondence and requests for materials should  
421 be addressed to [dhoconno@wisc.edu](mailto:dhoconno@wisc.edu).

422

## 423 **Figure Legends**

424 **Figure 1. Animal cohort definitions and ZIKV viral load from rhesus macaque fluids.** a.  
425 Animals included in this study and the ZIKV doses used to infect them. Solid lines and bars  
426 throughout the figure represent cohort 1 animals by color while stripped bars and dotted lines  
427 represent cohort 2 animals by color. b. Viral RNA loads measured in plasma, urine, and saliva  
428 for the two animals challenged with each dose of virus through 28 dpi. Cohort 1 animals are  
429 represented by a solid line while cohort 2 animals are represented by a dotted line for each fluid.  
430 Inset: vRNA loads from cohort 1 animals measured before and after rechallenge with homotypic  
431 Zika virus as indicated by an arrow. c. Number of plaque forming units per ml of serum for

432 cohort 2 animals. **d.** Viral RNA load per ml of CSF collected on 4 and 14 dpi. **e.** Viral RNA load  
433 per vaginal swab collected on 0, 7, 14, 21 and 28 dpi. NA: sample not available.

434

435 **Figure 2. Immune cell expansion and neutralizing antibody titers following ZIKV infection.**

436 **a.** Solid dots, lines and bars with corresponding color represent cohort 1 animals and open

437 circles, dotted lines or stripped bars represent cohort 2 animals throughout the figure. **b.**

438 Expansion of Ki-67+ (activated) NK cells, CD8+ T cells and CD4+ T cells were measured daily

439 for 10 days and then on days 14, 21 and 28 post-infection. Absolute numbers of activated

440 cells/ $\mu$ l of blood are presented relative to the baseline value set to 100%. **c.** Total number of

441 plasmablast cells found in PBMCs collected at 0 (cohort 2 only), 3, 7, 11 and 14 dpi for each

442 animal. **d.** PRNT<sub>90</sub> titers for cohort 1 and cohort 2.

443

444 **Figure 3. Characterization of Zika virus infection in animals infected during the first**

445 **trimester of pregnancy.** **a.** Schematic of animals presented in this figure as cohort 3. Dots,

446 lines and bars representing each animal match in color throughout the figure. **b.** vRNA copies of

447 the plasma, urine, and saliva from each pregnant animal. Oral swabs could not be obtained

448 from 660875. **c.** Absolute numbers of Ki-67+ NK, CD8+ T cell and CD4+ T cell populations

449 presented as a percentage relative to baseline (x100) over time in each animal. **d.** Plasmablast

450 expansion over time from each pregnant animal. The average plasmablast expansion of cohort

451 1 and cohort 2 animals infected with the 10<sup>4</sup> PFU is presented by the black line. Error bars

452 represent standard deviation. **e.** PRNT<sub>90</sub> titers over time for each animal. Lines representing the

453 titers from cohort 2 animals are overlaid at 28 dpi for reference (top to bottom: 610107,

454 181856, and 411359).

455

456 **Extended Data Figure 1. Schematic representation of the timeline of infection and**

457 **sampling for each animal in the presented studies.** Cohort 1 received the first ZIKV

458 challenges and were then rested for 6 weeks before a rechallenge. For all studies, samples  
459 were collected daily for 10 days and then on 14, 21, and 28 dpi as indicated by hashes in the  
460 timelines. Cohort 3 represents the two pregnant animals that were challenged on 2 different  
461 days. Both animals are currently in the once weekly sampling phase until the pregnancies come  
462 to term (~165 gestational days). Cohort 2 was a repeat experiment of cohort 1 that allowed for  
463 additional experiments and sample collection (e.g., serum plaque infectivity) that were not  
464 feasible when we initiated cohort 1 studies. These animals are currently in a 6-week rest period  
465 and will be rechallenged on June 6, 2016. Ages of all animals are indicated under each  
466 macaque identification number.

467

468 **Extended Data Figure 2. Complete blood counts and serum chemistries for macaques**  
469 **infected with ZIKV. a.** Animals were infected with different doses of ZIKV. Cohort 1 animals  
470 are represented by solid lines and cohort 2 animals are represented by dotted lines. All non-  
471 pregnant animals had serum chemistry analysis performed at -7, 0, 1, 2, 3, 4, 6, and 14 dpi or at  
472 -6, 2, 5 and 11 dpi. **b.** AST blood chemistries **c.** ALT serum chemistries. **d.** CK serum  
473 chemistries. Complete blood counts were measured prior to infection, daily for 10-11 days after  
474 infection and then every 3-7 days until 28 dpi. **e.** white blood cell counts. **f.** % lymphocytes. **g.**  
475 red blood cell counts.

476

477 **Extended Data Figure 3. qRT-PCR detection of ZIKV RNA is equally sensitive from serum**  
478 **and plasma.** vRNA copies/ml of plasma or serum were quantitated by qRT-PCR over multiple  
479 time points from cohort 2 animals. Sufficient baseline samples were not available from serum.

480

481 **Extended Data Figure 4. Antigen-specific T cell responses by IFN $\gamma$ -ELISPOT. a.** Average  
482 spot forming cell counts for PBMC collected from each animal at 4, 10 and 14 dpi. Data were  
483 baseline corrected by subtracting the average negative control values from each response. A

484 threshold of 10.0 SFC/100,000 cells was set as the minimum value to be considered a positive  
485 T cell response, as indicated by the dashed line. **b.** Each pool was comprised of 10 overlapping  
486 15mer peptides offset by 4 amino acids. **c.** Peptide pools eliciting T cell responses at 4, 10 and  
487 14 dpi for each animal. The region of the NS5 protein that is represented by each pool of  
488 overlapping 15mers is provided. MHC class I haplotypes of each cohort 2 animal are also  
489 presented. All three animals shared the A004 and B012b major histocompatibility complex  
490 haplotypes and two animals shared the A023 haplotype. Therefore, it was not surprising that 3  
491 pools were recognized by 2 different animals likely sharing the MHC class I allele that is  
492 presenting one of the peptides in those pools. Grayed pools were positive in more than one  
493 animal and bolded pools were positive at more than one time point in the same animal.

494

495 **Extended Data Figure 5. Plaque assay titers in a pregnant animal.** Log<sub>10</sub> PFU/ml serum  
496 (dotted line) is plotted relative to vRNA copies/ml plasma (solid line) for 660875.

497

498 **Extended Data Figure 6. Genetic diversity of the ZIKV challenge stock.** The ZIKV challenge  
499 stock was deep sequenced from all three animals. Nucleotide sites where at least 5% of  
500 sequences obtained from the challenge stock are different from the Genbank sequence are  
501 shown.

502

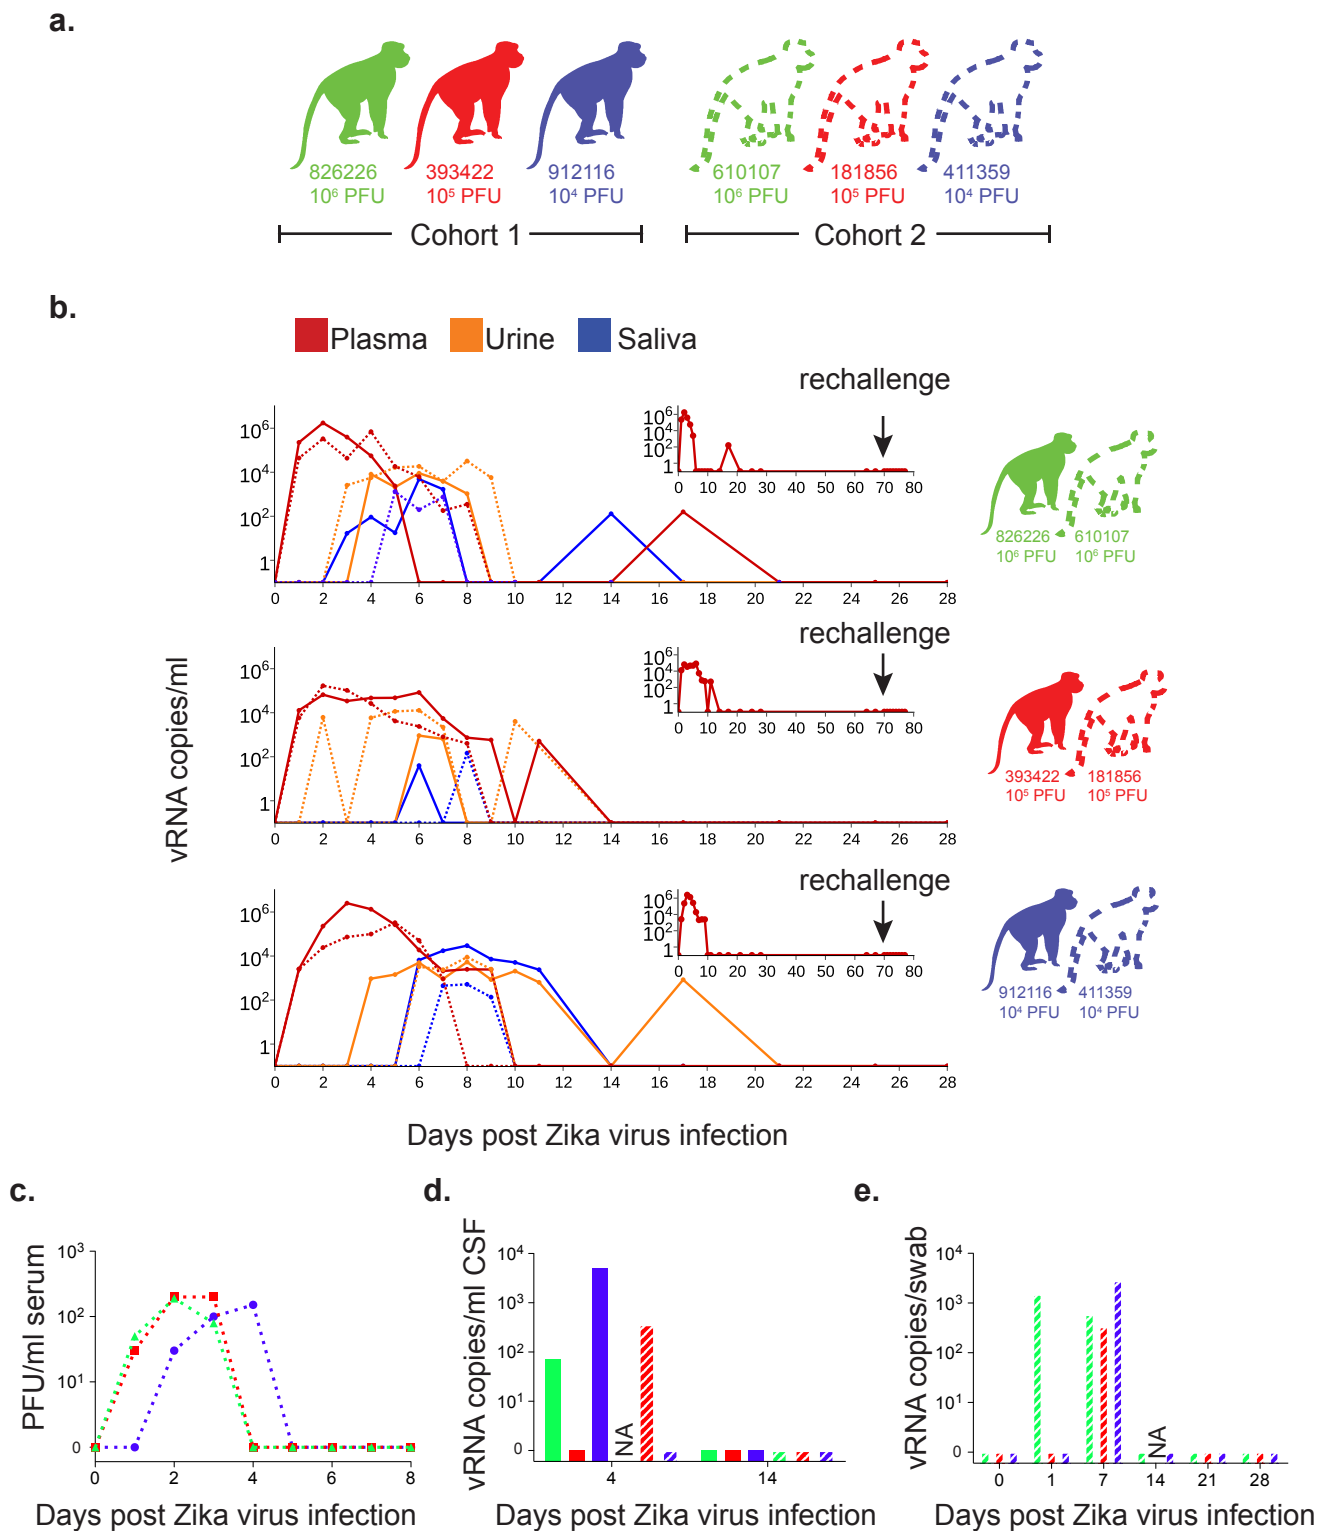

**Figure 1| Animal cohort definitions and ZIKV viral load from rhesus macaque fluids.** **a.** Animals included in this study and the ZIKV doses used to infect them. Solid lines and bars throughout the figure represent cohort 1 animals by color while striped bars and dotted lines represent cohort 2 animals by color. **b.** Viral RNA loads measured in plasma, urine, and saliva for the two animals challenged with each dose of virus through 28 dpi. Cohort 1 animals are represented by a solid line while cohort 2 animals are represented by a dotted line for each fluid. Inset: vRNA loads from cohort 1 animals measured before and after rechallenge with homotypic Zika virus as indicated by an arrow. **c.** Number of plaque forming units per ml of serum for cohort 2 animals. **d.** Viral RNA load per ml of CSF collected on 4 and 14 dpi. **e.** Viral RNA load per vaginal swab collected on 0, 7, 14, 21 and 28 dpi. NA: sample not available.

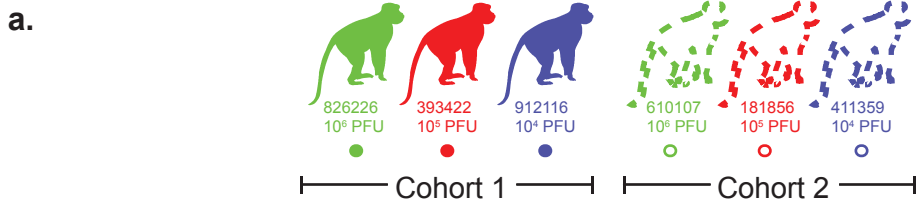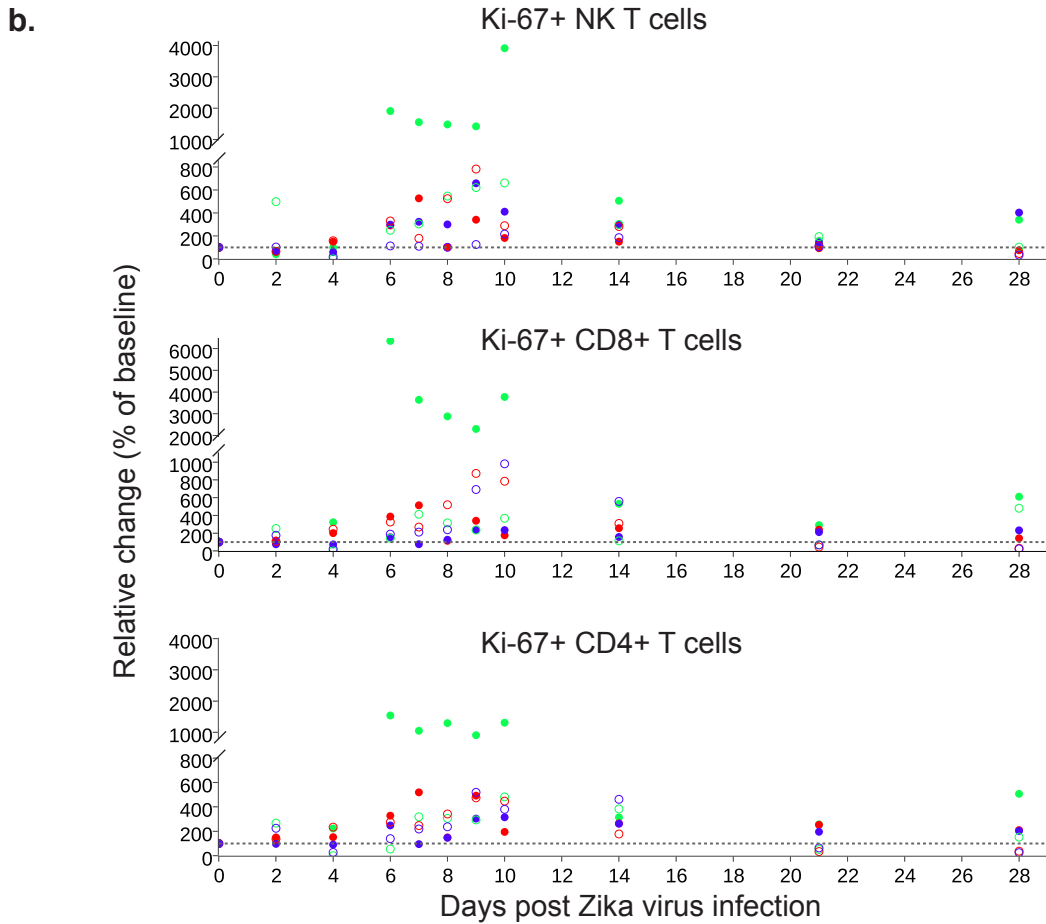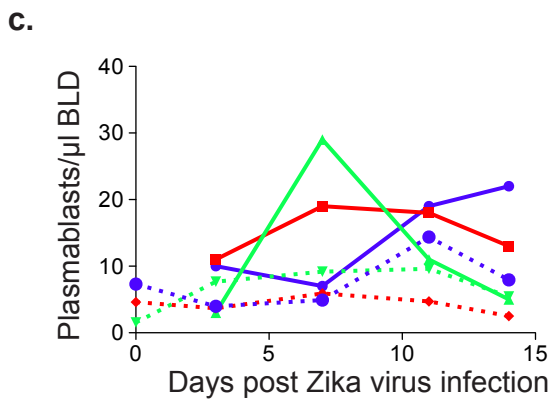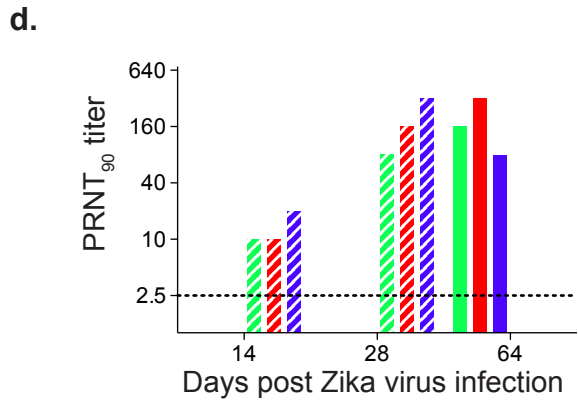

**Figure 2| Immune cell expansion and neutralizing antibody titers following ZIKV infection.** a. Solid dots, lines and bars with corresponding color represent cohort 1 animals and open circles, dotted lines or striped bars represent cohort 2 animals throughout the figure. b. Expansion of Ki-67+ (activated) NK cells, CD8+ T cells and CD4+ T cells were measured daily for 10 days and then on days 14, 21 and 28 post-infection. Absolute numbers of activated cells/ $\mu$ l of blood are presented relative to the baseline value set to 100%. c. Total number of plasmablast cells found in PBMCs collected at 0 (cohort 2 only), 3, 7, 11 and 14 dpi for each animal. d. PRNT<sub>90</sub> titers for cohort 1 and cohort 2.

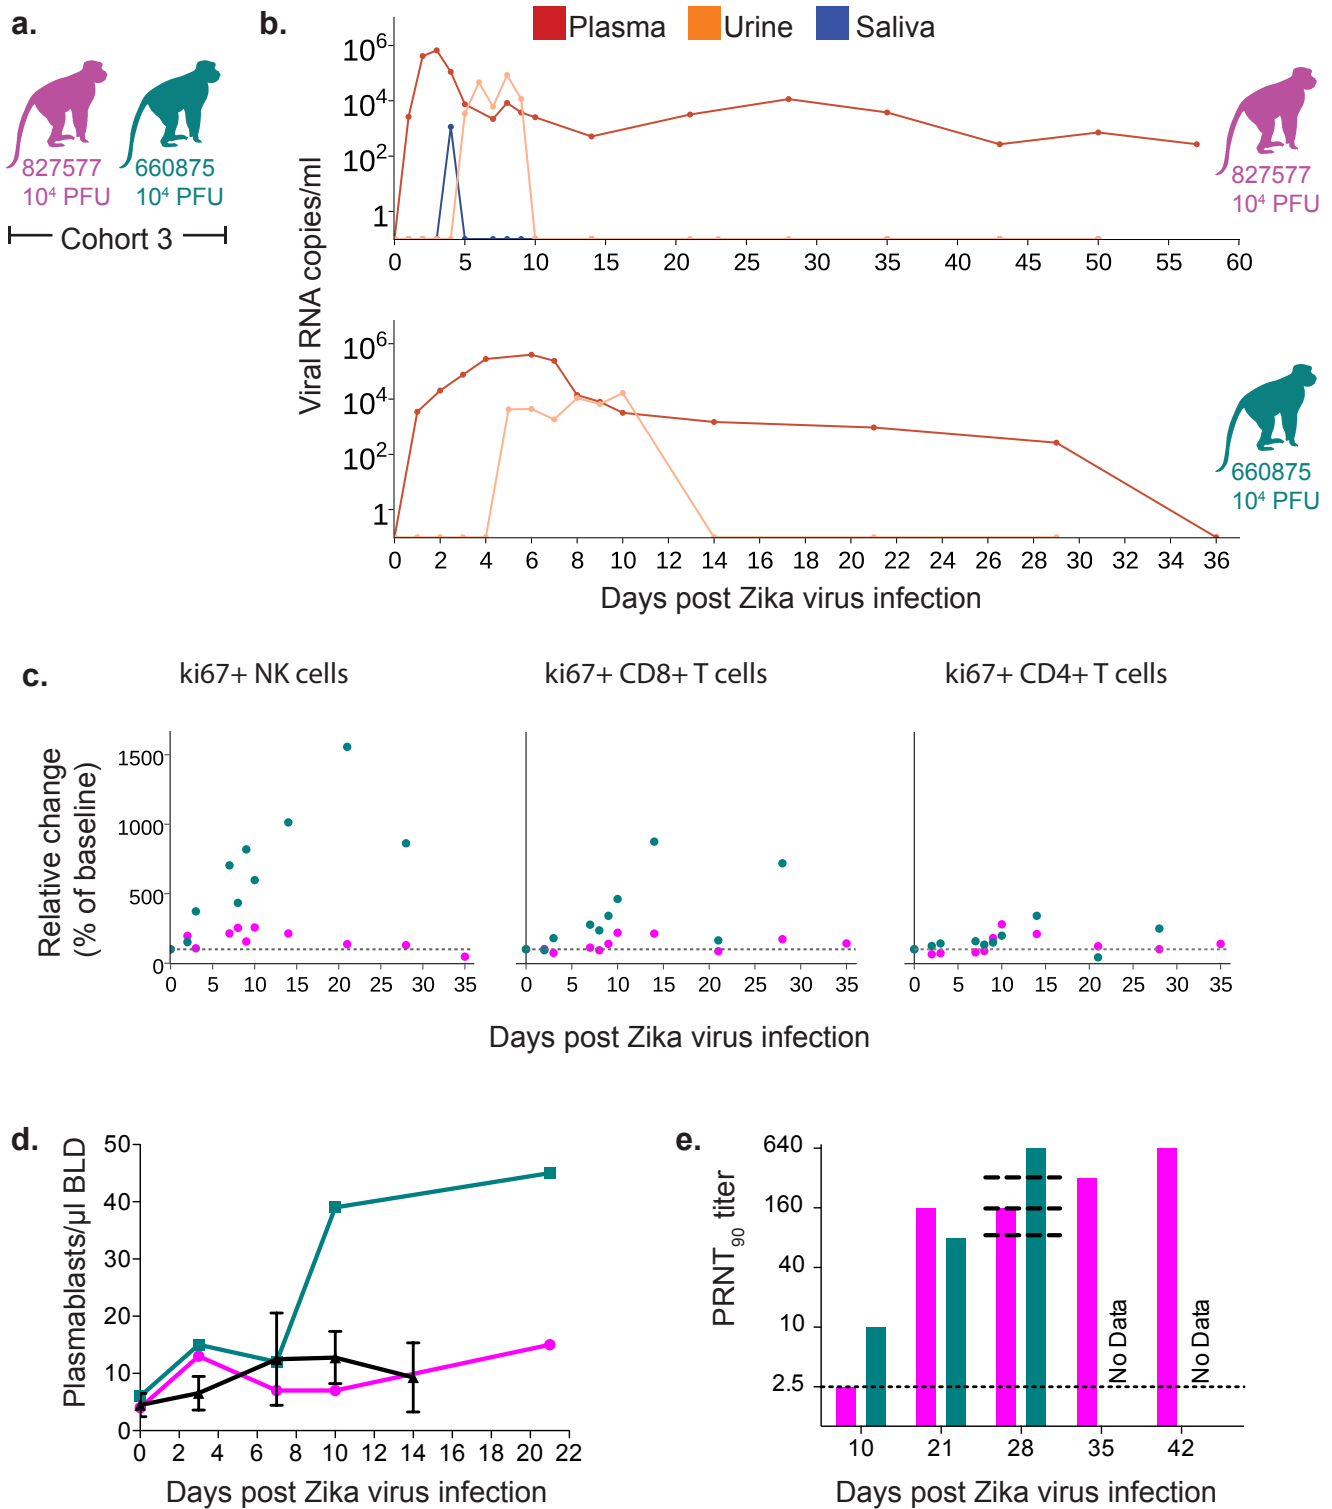

**Figure 3| Characterization of Zika virus infection in animals infected during the first trimester of pregnancy.** a. Schematic of animals presented in this figure as cohort 3. Dots, lines and bars representing each animal match in color throughout the figure. b. vRNA copies of the plasma, urine, and saliva from each pregnant animal. Oral swabs could not be obtained from 660875. c. Absolute numbers of Ki-67+ NK, CD8+ T cell and CD4+ T cell populations presented as a percentage relative to baseline (x100) over time in each animal. d. Plasmablast expansion over time from each pregnant animal. The average plasmablast expansion of cohort 1 and cohort 2 animals infected with  $10^4$  PFU ZIKV is presented by the black line. Error bars represent standard deviation. e. PRNT<sub>90</sub> titers over time for each animal. Lines representing the titers from cohort 2 animals are overlaid at 28 dpi for reference (top to bottom: 610107, 181856, and 411359).

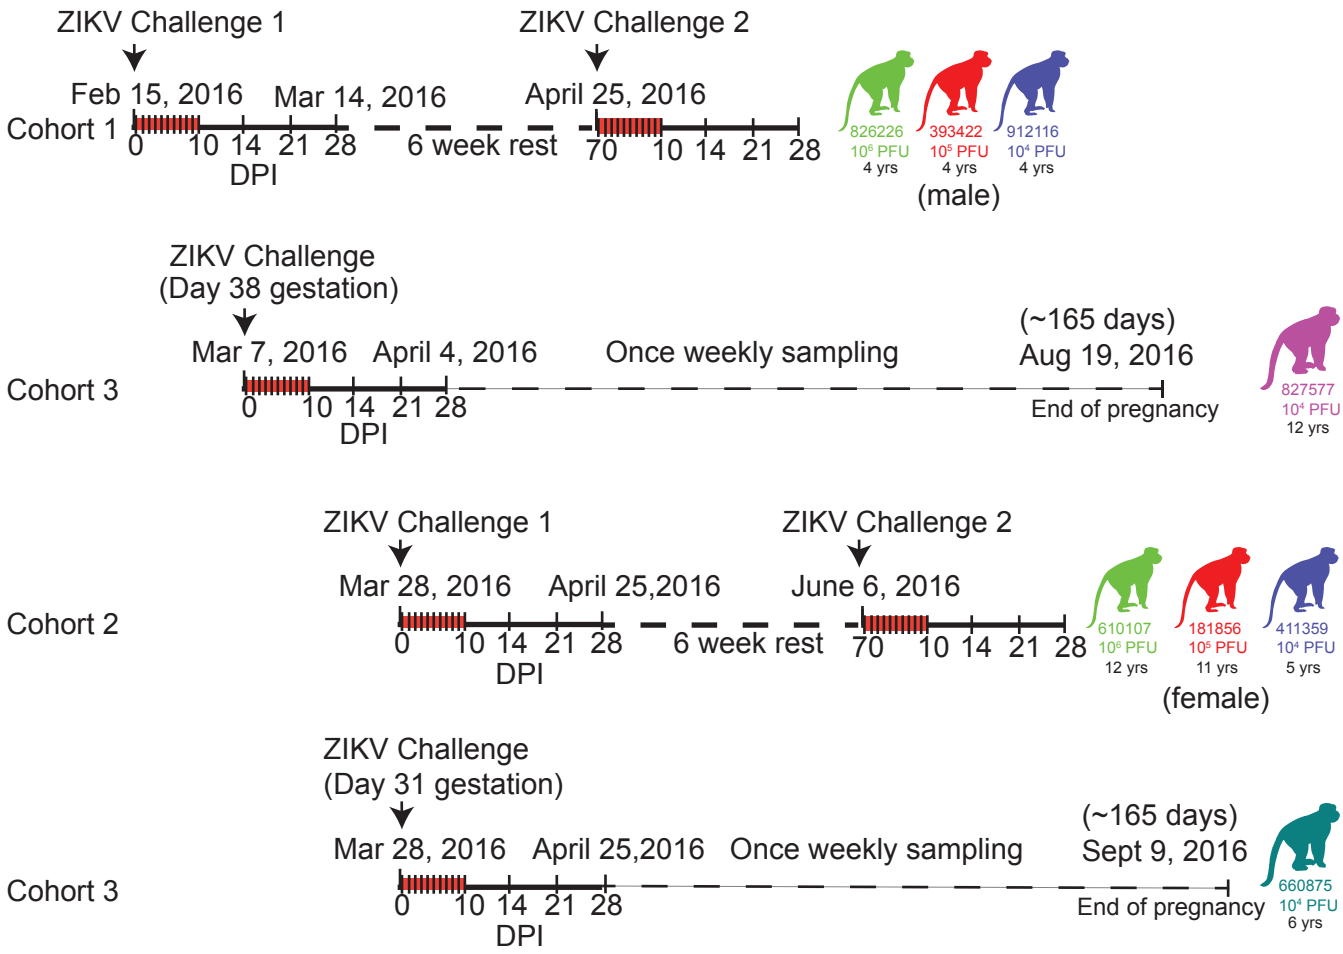

**Extended Data Figure 1| Schematic representation of the timeline of infection and sampling for each animal in the presented studies.** Cohort 1 received the first ZIKV challenges and were then rested for 6 weeks before a rechallenge. For all studies, samples were collected daily for 10 days and then on 14, 21, and 28 dpi as indicated by hashes in the timelines. Cohort 3 represents the two pregnant animals that were challenged on 2 different days. Both animals are currently in the once weekly sampling phase until the pregnancies come to term (~165 gestational days). Cohort 2 was a repeat experiment of cohort 1 that allowed for additional experiments and sample collection (e.g., serum plaque infectivity) that were not feasible when we initiated cohort 1 studies. These animals are currently in a 6-week rest period and will be rechallenged on June 6, 2016. Ages of all animals are indicated under each macaque identification number.



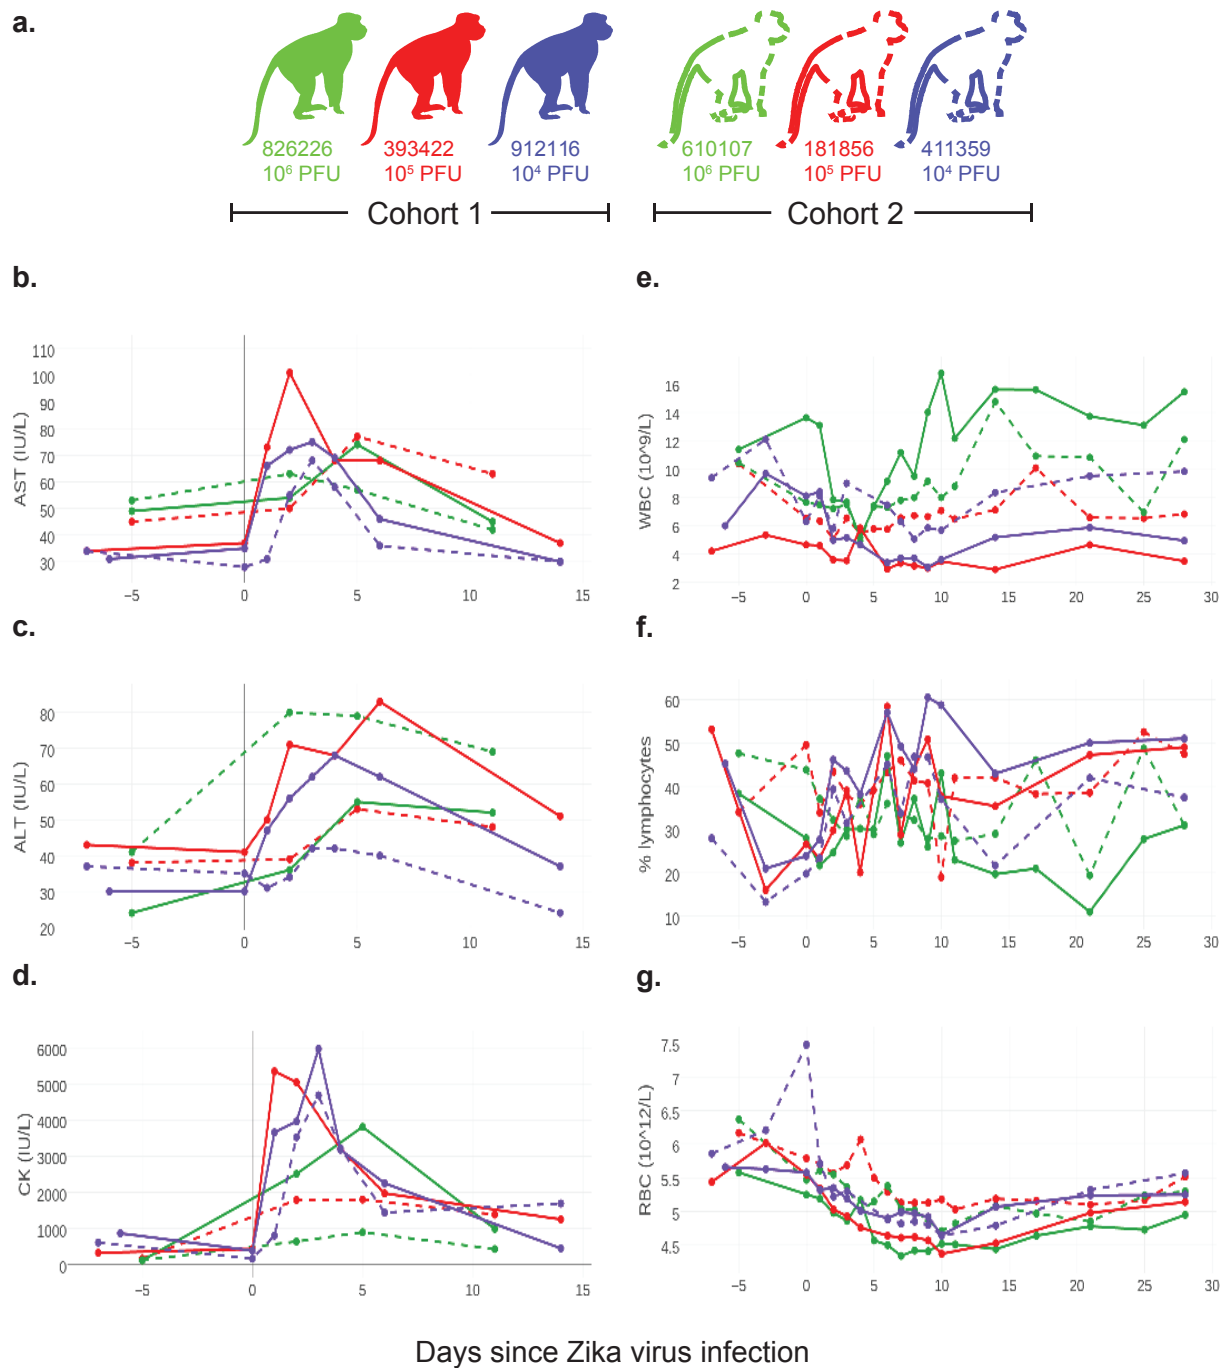

**Extended Data Figure 2] Complete blood counts and serum chemistries for macaques infected with ZIKV.**

**a.** Animals were infected with different doses of ZIKV. Cohort 1 animals are represented by solid lines and cohort 2 animals are represented by dotted lines. All non-pregnant animals had serum chemistry analysis performed at -7, 0, 1, 2, 3, 4, 6, and 14 dpi or at -6, 2, 5 and 11 dpi. **b.** AST blood chemistries **c.** ALT serum chemistries. **d.** CK serum chemistries. Complete blood counts were measured prior to infection, daily for 10-11 days after infection and then every 3-7 days until 28 dpi. **e.** white blood cell counts. **f.** % lymphocytes. **g.** red blood cell counts.

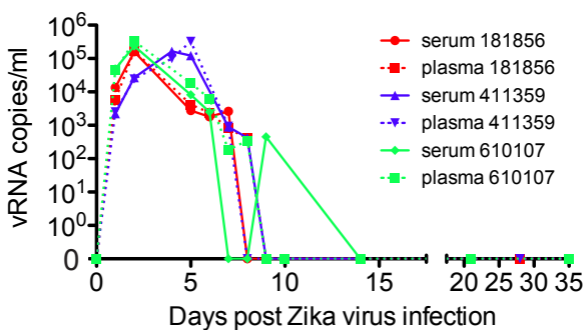

**Extended Data Figure 3 | qRT-PCR detection of ZIKV RNA is equally sensitive from serum and plasma.** vRNA copies/ml of plasma or serum were quantitated by qRT-PCR over multiple time points from cohort 2 animals. Sufficient baseline samples were not available from serum.

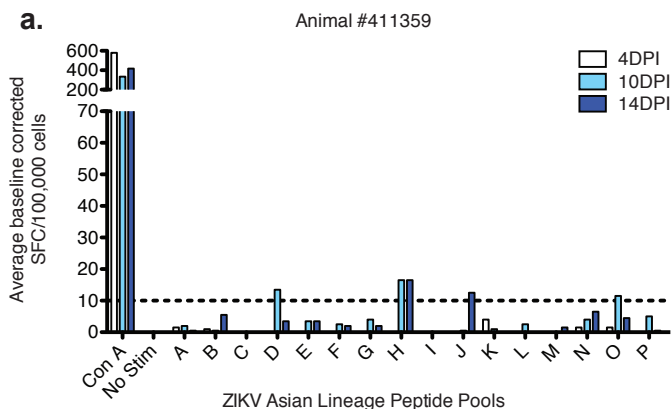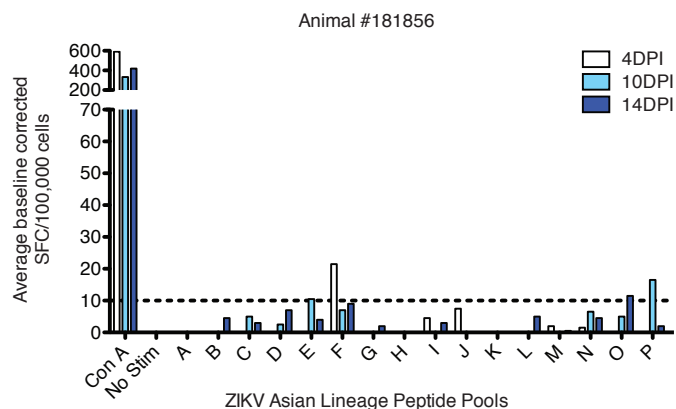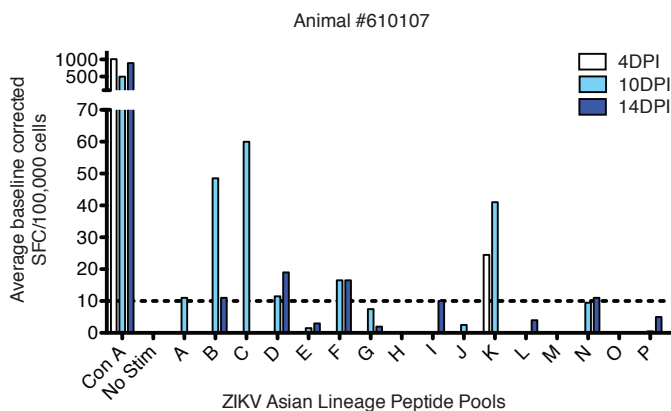

**b. Asian lineage ZIKV peptide pools**

| Pool ID | Target sequence                |
|---------|--------------------------------|
| A       | ZIKV Asian lineage NS5 1-51    |
| B       | ZIKV Asian lineage NS5 41-91   |
| C       | ZIKV Asian lineage NS5 81-131  |
| D       | ZIKV Asian lineage NS5 121-171 |
| E       | ZIKV Asian lineage NS5 161-211 |
| F       | ZIKV Asian lineage NS5 201-251 |
| G       | ZIKV Asian lineage NS5 241-291 |
| H       | ZIKV Asian lineage NS5 281-331 |
| I       | ZIKV Asian lineage NS5 321-371 |
| J       | ZIKV Asian lineage NS5 361-411 |
| K       | ZIKV Asian lineage NS5 401-451 |
| L       | ZIKV Asian lineage NS5 441-491 |
| M       | ZIKV Asian lineage NS5 481-531 |
| N       | ZIKV Asian lineage NS5 521-571 |
| O       | ZIKV Asian lineage NS5 561-611 |
| P       | ZIKV Asian lineage NS5 601-651 |

**c. Summary of NS5-specific T cell responses**

| Animal ID | MHC Haplotype            | DPI | Pool ID | Target Sequence               |                               |
|-----------|--------------------------|-----|---------|-------------------------------|-------------------------------|
| 411359    | A004, A023, B012b, B024a | 10  | D       | ZIKV Asian NS5 121-171        |                               |
|           |                          |     | H       | <b>ZIKV Asian NS5 281-331</b> |                               |
|           |                          |     | O       | ZIKV Asian NS5 561-575        |                               |
| 181856    | A001, A004, B012b, B055  | 4   | F       | ZIKV Asian NS5 201-251        |                               |
|           |                          | 10  | P       | ZIKV Asian NS5 601-651        |                               |
|           |                          | 14  | O       | ZIKV Asian NS5 561-575        |                               |
| 610107    | A004, A023, B012b, B048  | 4   | K       | <b>ZIKV Asian NS5 401-451</b> |                               |
|           |                          |     | 10      | A                             | ZIKV Asian NS5 1-51           |
|           |                          |     |         | B                             | <b>ZIKV Asian NS5 41-91</b>   |
|           |                          |     |         | C                             | ZIKV Asian NS5 81-131         |
|           |                          |     |         | D                             | <b>ZIKV Asian NS5 121-171</b> |
|           |                          | F   |         | <b>ZIKV Asian NS5 201-251</b> |                               |
|           |                          | 14  | K       | <b>ZIKV Asian NS5 401-451</b> |                               |
|           |                          |     | B       | <b>ZIKV Asian NS5 41-91</b>   |                               |
|           |                          |     | D       | <b>ZIKV Asian NS5 121-171</b> |                               |
|           |                          |     | F       | <b>ZIKV Asian NS5 201-251</b> |                               |
| N         | ZIKV Asian NS5 521-571   |     |         |                               |                               |

**Extended Data Figure 4| Antigen-specific T cell responses by IFN $\gamma$ -ELISPOT.** **a.** Average spot forming cell counts for PBMC collected from each animal at 4, 10 and 14 dpi. Data were baseline corrected by subtracting the average negative control values from each response. A threshold of 10.0 SFC/100,000 cells was set as the minimum value to be considered a positive T cell response, as indicated by the dashed line. **b.** Each pool was comprised of 10 overlapping 15mer peptides offset by 4 amino acids. **c.** Peptide pools eliciting T cell responses at 4, 10 and 14 dpi for each animal. The region of the NS5 protein that is represented by each pool of overlapping 15mers is provided. MHC class I haplotypes of each cohort 2 animal are also presented. All three animals shared the A004 and B012b major histocompatibility complex haplotypes and two animals shared the A023 haplotype. Therefore, it was not surprising that 3 pools were recognized by 2 different animals likely sharing the MHC class I allele that is presenting one of the peptides in those pools. Grayed pools were positive in more than one animal and bolded pools were positive at more than one time point in the same animal.

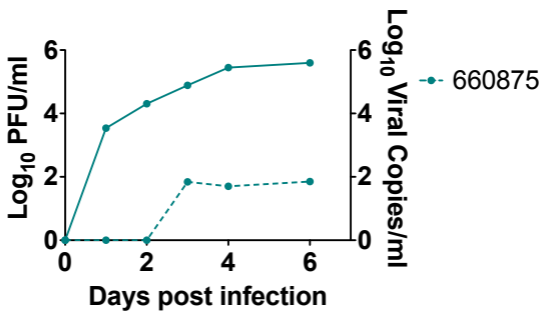

**Extended Data Figure 5|** Plaque assay titers in a pregnant animal. Log<sub>10</sub> PFU/ml serum (dotted line) is plotted relative to vRNA copies/ml plasma (solid line) for 660875.

| Site relative to KJ776791 | Change | Amino Acid Change | Codon Change | Protein Effect | Variant Frequency |
|---------------------------|--------|-------------------|--------------|----------------|-------------------|
| 801                       | T -> C | F->L              | UUC->CUC     | Substitution   | 17.9%             |
| 2318                      | C -> T |                   | CUC->CUT     | None           | 18.7%             |
| 2863                      | T -> C | L->P              | CUC->CCC     | Substitution   | 7.7%              |
| 3223                      | A -> T | K->I              | AAA->ATA     | Substitution   | 10.5%             |
| 3475                      | T -> C | M->T              | AUG->ACG     | Substitution   | 7.9%              |
| 3740                      | C -> T |                   | GUC->GUT     | None           | 11.1%             |
| 3835                      | C -> T | A->V              | GCG->GTG     | Substitution   | 15.8%             |
| 4242                      | G -> C | E->Q              | GAG->CAG     | Substitution   | 40.9%             |

**Extended Data Figure 6 | Genetic diversity of the ZIKV challenge stock.** The ZIKV challenge stock was deep sequenced from all three animals. Nucleotide sites where at least 5% of sequences obtained from the challenge stock are different from the Genbank sequence are shown.

## SI Guide

### Supplementary Information Data

Morbidity, complete blood counts and serum blood chemistry findings in nonpregnant rhesus macaques exposed to ZIKV. Data is shown in Extended Data Fig. 2.

1 To detect signs of morbidity, animals were evaluated daily for evidence of  
2 disease, injury, or psychological abnormalities (e.g., inappetence, dehydration, diarrhea,  
3 depression, inactivity, trauma, self-injurious or stereotypical repetitive behaviors (e.g.,  
4 pacing) often seen in captive animals). Five of six animals exhibited mild to moderate  
5 inappetence, which resulted in mild weight loss in four animals. Two animals (912116  
6 and 393422) also developed a very mild rash around the inoculation site at 1 dpi that  
7 persisted for 4-5 days. No other abnormal clinical signs were noted (e.g., increased body  
8 temperature, joint pain, lymphadenopathy, lethargy).

9 Daily complete blood counts (CBCs) were evaluated for all six non-pregnant  
10 animals for 10 dpi and then every 3 to 7 days thereafter and serum chemistry analyses  
11 were performed intermittently post-infection as per protocol (Extended Data Fig. 2).  
12 Reference intervals (RI) developed for the WNPRC colony for species, gender, and age  
13 were used to evaluate results. All six animals developed elevated serum creatine kinase  
14 (CK), which peaked by 5 dpi (Extended Data Fig. 2d). Increases in serum CK are  
15 strongly associated with muscle damage and myositis (skeletal, smooth, and cardiac),  
16 but can also be caused by repeated sedation, hemolysis, and endocrine abnormalities  
17 <sup>20,21</sup>. Predictable increases in CK have been noted in nonhuman primates undergoing  
18 repeated sedation and venipuncture <sup>21</sup>. However, CK levels did not remain elevated  
19 during the 10-day period of daily sedation and blood collection, suggesting other causes  
20 for the noted increase in values. Future studies are planned to determine if CK increases  
21 may be due to viral myositis. ALT values in three of six animals exceeded the maximum  
22 WNPRC RI (Extended Data Fig. 2c) and the expected increase associated with repeated  
23 ketamine sedation <sup>21</sup>. Although AST values exceeded upper RI values for all six non-  
24 pregnant animals after infection, they did not increase above the expected levels  
25 previously associated with repeated ketamine sedation described by Lugo-Roman et al.  
26 (Extended Data Fig. 2b) <sup>21</sup>.

27 All the animals displayed decreased total WBC numbers following infection, but  
28 only one animal fell below the RI with a value of 2.88 ths/ul (3.70-15.70). WBC numbers  
29 rebounded almost completely to pre-infection levels around 10 dpi in all six animals  
30 (Extended Data Fig. 1e). Both animals that received the highest dose of inoculum  
31 developed persistent mature neutrophilia around 7-14 dpi that lasted through 28 dpi.  
32 Five of 6 non-pregnant animals had mild regenerative anemia characterized by varying  
33 degrees of polychromasia and anisocytosis, but whether this was secondary to the viral  
34 infection or simply a result of frequent blood collections could not be determined. Platelet  
35 values for all six animals remained within RI. Both cellular dyscrasias and elevated  
36 transaminases have been described in human ZIKV case reports; myositis has not been  
37 reported<sup>22,23</sup>.

38

#### 39 References

- 40 20. Stockham, S. L. *Fundamentals of veterinary clinical pathology*. (Iowa State Press,  
41 Ames, Iowa, 2002).
- 42 21. Lugo-Roman, L. A., Rico, P. J., Sturdivant, R., Burks, R. & Settle, T. L. Effects of  
43 serial anesthesia using ketamine or ketamine/medetomidine on hematology and  
44 serum biochemistry values in rhesus macaques (*Macaca mulatta*). *J Med Primatol*  
45 **39**, 41-49 (2010).
- 46 22. Tappe, D. et al. Acute Zika virus infection after travel to Malaysian Borneo,  
47 September 2014. *Emerg Infect Dis* **21**, 911-913 (2015).
- 48 23. Zammarchi, L. et al. Zika virus infections imported to Italy: clinical, immunological  
49 and virological findings, and public health implications. *J Clin Virol* **63**, 32-35  
50 (2015).

51
